# Supplementary material for: Architectural proteins CTCF and cohesin have distinct roles in modulating the higher order structure and expression of the CFTR locus
Source: PubMed Central journal article supplement — Nucleic Acids Res. 2014 Jul 31;42(15):9612–22. doi: 10.1093/nar/gku648 (PMC4150766; doi:10.1093/nar/gku648), 2014-07-31
Supplement: supp_gku648_nar-01528-x-2014-File008.pdf [file supp_gku648_nar-01528-x-2014-File008.pdf]

## Supplementary Figure Legends

### **SUPPLEMENTARY FIGURE 1**

***CTCF and RAD21 occupancy across CFTR in airway cell lines.*** A, B. ChIP for CTCF (A) or RAD21 (B) was performed in each cell type indicated. Data are presented as fold enrichment over IgG.  $n \geq 2$  for each cell line and representative data are shown.

### **SUPPLEMENTARY FIGURE 2**

***Altered expression of other genes after CTCF or RAD21 loss.*** Changes in gene expression of *SLC35C2*, *MUC2*, *MUC6* measured by RT-qPCR after treatment with NC siRNA (grey) and either RAD21 or CTCF targeting siRNAs (black). \*,  $p < 0.05$ ; \*\*,  $p < 0.01$ ; \*\*\*,  $p < 0.001$  as determined by an unpaired, two-tailed Student's t-test.

### **SUPPLEMENTARY FIGURE 3**

***Role of architectural proteins in airway cell lines.*** A. q3C interactions in Calu-3 and 16HBE14o- cell lines. Details as described in Fig. 2 legend. B. q3C interactions in 16HBE14o- treated with a NC siRNA (grey) or with a CTCF targeting siRNA (black). Arrows mark sites of interest. A graph below expands interactions at the airway-selective DHS-35 and -44 kb sites that show altered interactions with the promoter after CTCF depletion. Data shown have an  $n=3$ , ^ marks statistically significant change. Experimental details as in Fig. 2 legend. C, E. Western blots show siRNA mediated depletion of CTCF (C) or RAD21 (E) in 16HBE14o- cells with  $\beta$ -tubulin as the loading control. D, F. RT-qPCR for *CFTR* expression after knockdown of CTCF (D) or RAD21 (F) (black) compared to NC siRNA treated cells (grey). \*  $p < 0.05$  as determined by an unpaired, two-tailed Student's t-test.

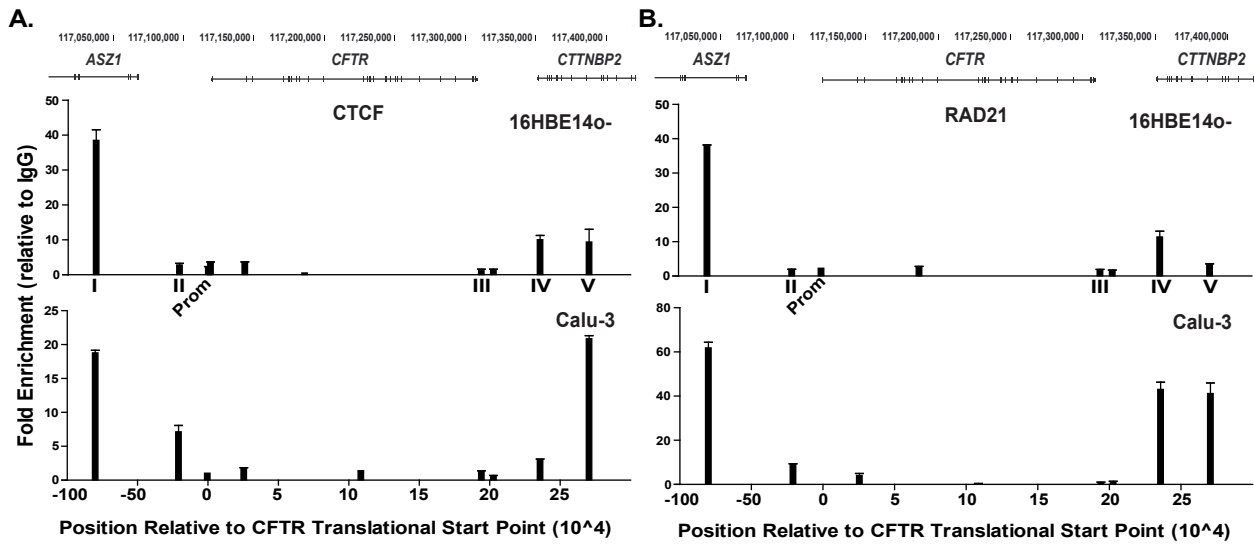

**SUPPLEMENTARY FIGURE 1**

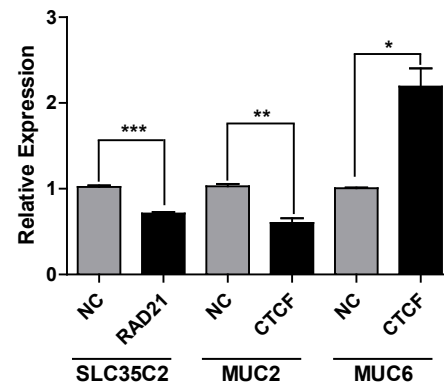

SUPPLEMENTARY FIGURE 2

**A.**

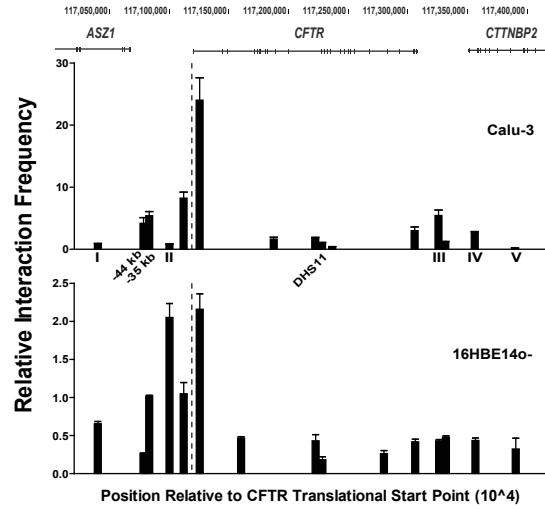

**B.**

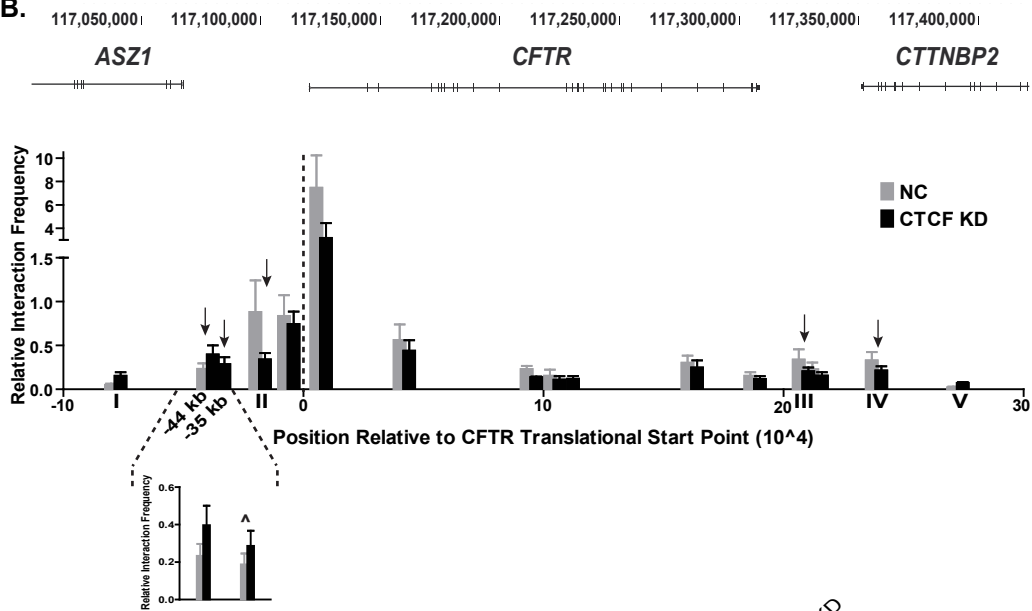

**C.**

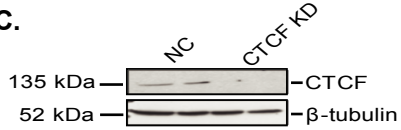

**D.**

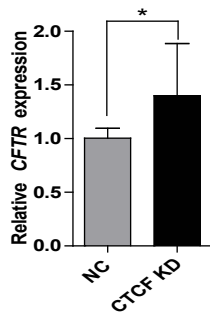

**E.**

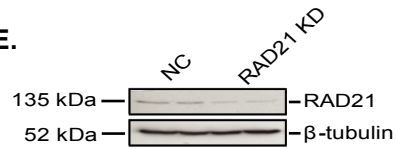

**F.**

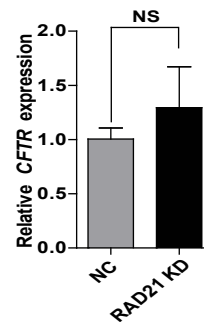

16HBE14o-

**SUPPLEMENTARY FIGURE 3**

**Supplementary Table 1**

| <b>RT-qPCR Primers</b>       | <b>Sequences</b>                       |
|------------------------------|----------------------------------------|
| 18s rRNA F                   | CGGCTACCACATCCAAGGAA                   |
| 18s rRNA R                   | GCTGGAATTACCGCGGCT                     |
| 18s rRNA probe               | FAM-TGCTGGCACCAGACTTGCCCTC-TAMRA       |
| CFTR exon 5/6a F             | AGCTGTCAAGCCGTGTCTAGATA                |
| CFTR exon 5/6a R             | ATGAGGAGTGCCACTTGCAAA!                 |
| CFTR exon 5/6a probe         | FAM-CACACGAAATGTGCCAATGCAAGTCCTT-TAMRA |
| <b>ChIP-qPCR Primer Sets</b> | <b>Sequences</b>                       |
| -80.1 kb F                   | GGGCATTCAAAGAAAAGCAGAAAGC              |
| -80.1 kb R                   | ACCCAGTACAGAGACGTGACA                  |
| -20.9 kb F                   | CCGGGATGTTGTTTGAAGCTT                  |
| -20.9 kb R                   | TTTAAATAGTTGAATAGAGGACGAGATACTTT       |
| Promoter F                   | GTTCTCCCGCCGGTGG                       |
| Promoter R                   | CAGTCGCGGCCTCTCTTAG                    |
| Intron 1 CTCF F              | GCAGTTAATCCTGGAACCTCCGGTGC             |
| Intron 1 CTCF R              | AAGTCTTCTCTCTCATCCACAGGG               |
| Intron 1 DHS F               | TCATTGTCAACTGTCAAGTAGCAA               |
| Intron 1 DHS R               | CAGAGTTAGGATTCCAGCCAGG                 |
| Intron 2 CTCF F              | TGGTGGCATTGTCCTTATGCTGGT               |
| Intron 2 CTCF R              | AGGGCTCCTTCTTTCGTGGTCTT                |
| Intron 8 F (NC) <sup>1</sup> | GCTTCCTCCTGATCAATCTTTAGG               |
| Intron 8 R (NC) <sup>1</sup> | AAAAATTCCTTGCCTCACTATTGC               |
| Intron 10a,b DHS F           | TGCTTTATTGAATGGCATTACCTCTA             |
| Intron 10a,b DHS R           | AGATGCTTGTGGTAAGGGAGGAG                |
| Intron 10c DHS F             | GGAGAGTACTGTCTCTTATCAGCCATCT           |
| Intron 10c DHS R             | CTGGTCTTTTCAACACTTTGAGTCA              |
| Intron 11 DHS F              | TCCAAAAGCTGAGACAGGAAACT                |
| Intron 11 DHS R              | ATTACATACACACAAAAGTACACACATGACT        |
| Intron 14a F                 | TGAGCCAGAAGTGGCAACCT                   |
| Intron 14a R                 | GCTGCAGACCTTCCCAGTGA                   |
| +6.8 kb DHS F                | TCTTCTTTCCATTACCTTTGTC                 |
| +6.8 kb DHS R                | TTTTGGTTTCATTTATCAGCACATC              |
| +15.6 kb DHS F               | ATCCATTTTCTTCAAGTCTCTCTCCAT            |
| +15.6 kb DHS R               | GGAATGAGGATTGTTTATGATTTGG              |
| +48.9 kb F                   | GGCATCAGCCAGTCAAGGTT                   |
| +48.9 kb R                   | AGCAGAGGGCAAAGTGGTACTT                 |
| +83.7 kb F                   | CCGGGTGCAACATGCAAAGC                   |
| +83.7 kb R                   | AGCCCTCTGCTGGAAGCGTG                   |
| <b>q3C Primer Sets</b>       |                                        |
| Ercc3 F                      | CCCTGAGGTGAGTTTGTGGAAT                 |
| Ercc3 R                      | AGGATCTCTGTTTAAATGGAAAAGCTT            |
| Ercc3 Probe                  | FAM-CAGAGTCGGATCAGCCTTCATCCTT-TAMRA    |
| Promoter Probe               | FAM-CTCCGACACGCAAAGGAAGCGCT-TAMRA      |
| Promoter R                   | GCAGTGTGGTCTGATGCAT                    |
| -20.9kb Probe                | FAM-CTTGATTTCATTAGGTGACCTGA-NFQ MGB    |
| -20.9 kb R                   | CCAAATACTGGACAAAAATGAACTTC             |

|          |                              |
|----------|------------------------------|
| -80.1 kb | GAGACTAACAAAAGGTTCTGTATCA    |
| -41.7 kb | TGGACCTGGGTACATCTGTC         |
| -36.8 kb | TGTTATGTGCTGGTCCAAGA         |
| -20.9 kb | CCAAATACTGGACAAAAATGAACTTC   |
| -3 kb    | TGCCTGGCACAGAGATGGA          |
| Promoter | GCAGTGTGGGTCTGATGCAT         |
| S2       | CATTGTGTCAGCAAAGAGCTTAGG     |
| S3       | GGTTTAAATATGTGCAAGGAGGATGTC  |
| Int3     | TTTTCCCTAGCCTGTCAATTGC       |
| Int8     | GCTTCCTCCTGATCAATCTTTAGG     |
| Int10a,b | ACCCTATATCATTGCCCTTTGTATG    |
| Int10c   | AAGCATTTTCTCCTTTTCCTCAAC     |
| Int11    | TGACTCTGATGTCAAATGTTTCTCAA   |
| Int14a   | TGAGCCAGAAGTGGCAACCT         |
| Int18    | GCTTGCTGACCCTTCTTCAG         |
| Int19    | GGGAGGAGGTGCATTGAAGTTA       |
| Int20(2) | GCGGTCATAAAGGGTCATA          |
| Int21    | TGTTGACTTTTCTCTAATGAAGATG    |
| Ex24     | GTGTTGGAGAAGAAGTCAAATCATACTT |
| 3'Ins    | CTGTGGTTTGAATGTGTTCCCTAA     |
| 3'+20kb  | CTGCTACAAGCCCACTATAACAATATTG |
| +48.9 kb | AGTGCCGCTAGGTGATCAGATAA      |
| +83.7 kb | GCTGGAAGCGTGGAGTA            |

<sup>1</sup> NC – Negative control ChIP site

## Supplementary Table 2

| <b>q3C Statistics RAD21 Knockdown (Fig. 2C,D)</b>                  | <b>p-values</b> |
|--------------------------------------------------------------------|-----------------|
| -80.1 kb (I)                                                       | p=0.0195        |
| -20.9 kb (II)                                                      | p=0.0206        |
| DHS 10c                                                            | p=0.0059        |
| DHS 11                                                             | p=0.0137        |
| 3'Insulator (+6.8 kb and +15.6 kb, III)                            | p=0.0208        |
| +48.9 kb (IV)                                                      | p=0.0207        |
| <b>q3C Statistics CTCF Knockdown -20.9 kb Bait (Fig. 2B)</b>       |                 |
| +48.9 kb (IV)                                                      | p=0.0495        |
| <b>q3C Statistics FOXA1/A2 Knockdown (Fig. 2F)</b>                 |                 |
| -36.8 kb                                                           | p=0.0448        |
| DHS 10a,b                                                          | p=0.0089        |
| DHS 11                                                             | p=0.002         |
| <b>q3C Statistics CTCF/RAD21 Knockdown Prom Bait (Fig. 3A)</b>     | <b>p-values</b> |
| -80.1 kb                                                           | p=0.0082        |
| -20.9 kb                                                           | p=0.0125        |
| DHS 10a,b                                                          | p=0.0370        |
| DHS 10c                                                            | p=0.0388        |
| Int14a                                                             | p=0.0408        |
| Int19                                                              | p=0.0448        |
| +48.9 kb (IV)                                                      | p=0.0315        |
| +83.7 kb (V)                                                       | p=0.0151        |
| <b>q3C Statistics CTCF/RAD21 Knockdown -20.9 kb Bait (Fig. 3B)</b> | <b>p-values</b> |
| Int14a                                                             | p=0.0224        |
| Int19                                                              | p=0.0191        |
| +48.9 kb (IV)                                                      | p=0.0417        |
| <b>q3C Statistics CTCF Knockdown 16HBE14o- (Fig. S4B)</b>          |                 |
| -35 kb                                                             | p=0.0132        |

| <b>H3K27ac Statistics (Fig. 5C)</b> | <b>p-values</b> |
|-------------------------------------|-----------------|
| -80.1 kb (I)                        | 0.0381          |
| -2 kb promoter                      | 0.025           |
| DHS 1                               | 0.004           |
| DHS 10a,b                           | 0.0058          |
| DHS 11                              | 0.0451          |
